# Supplementary material
Source: publisher site journal article supplement (https://www.spandidos-publications.com/2590/downloadSupplementary)

Figure S1. WPSC effects on lung cell proliferation. A549, H460 and BEAS-2B cell lines were grown in the presence of 0.5% WPSC. The cell number was determined by counting in a hemocytometer after detachment of cells with trypsin every day up to 8 days. Representative hemocytometer images are shown for the three cell lines: (A) BEAS-2B, (B) A549, (C) H460.

#### A. BEAS-2B

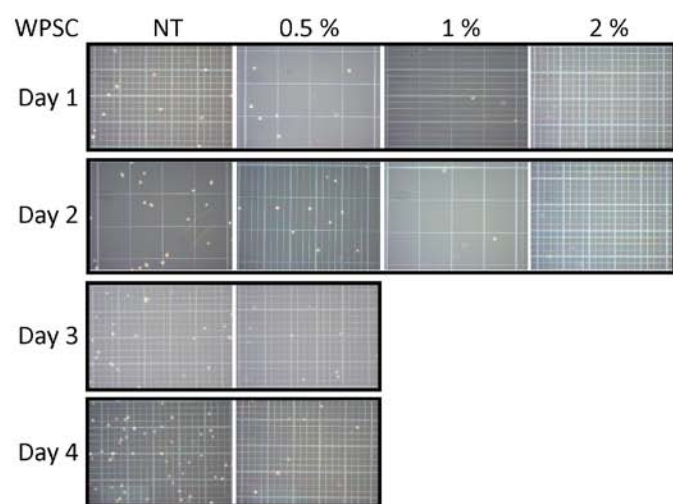

#### B. A549

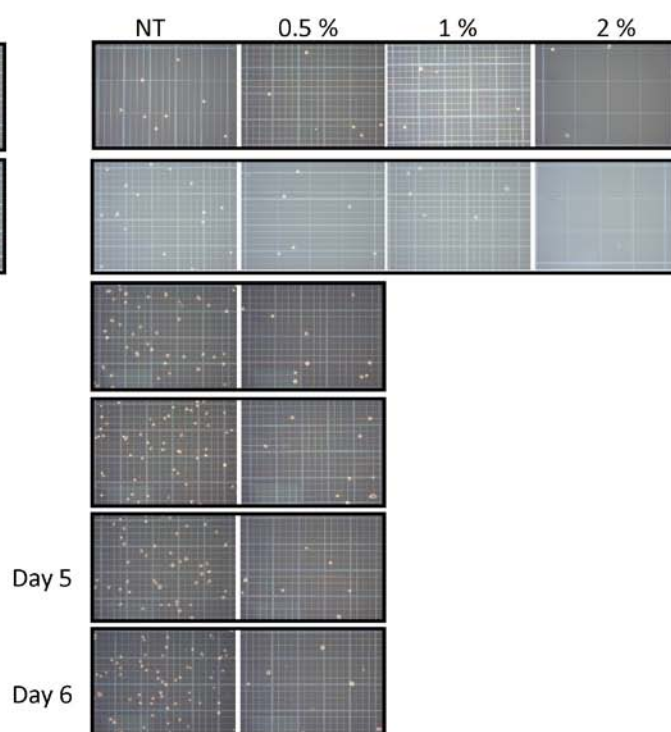

#### C. H460

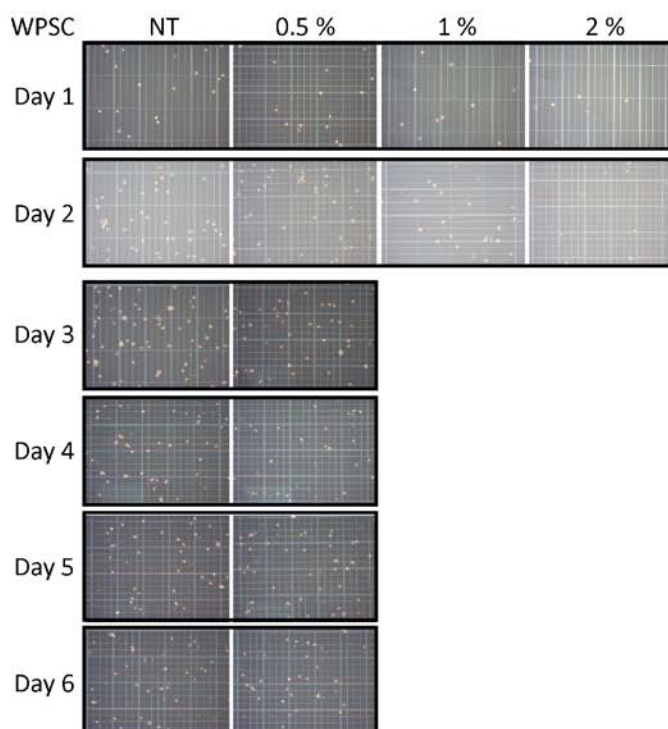

Figure S2. WPSC effects on DNA damage in lung cancer cells. A549 and H460 cell lines were treated with 0.5% WPSC for 8 days or  $H_2O_2$  as positive control. (A) The levels of DNA damage were examined by comet assay using confocal microscopy. Scale bar = 50  $\mu m$ . (B) Comet tail length quantification is shown for the different treatment conditions. (C) A representative image of confocal microscopic analysis of the foci formation for  $\gamma H2AX$  (green) and 53BP1 (orange) in WPSC-treated cells. Scale bar = 10  $\mu m$ . (D and E) Frequency of foci formation is shown. Then, 100 cells were counted, and foci were quantified. Results represent means of 3 independent experiments and data represent mean  $\pm$  standard error of mean. \* $P \leq 0.05$ , \*\* $P \leq 0.01$ , \*\*\* $P \leq 0.001$ .

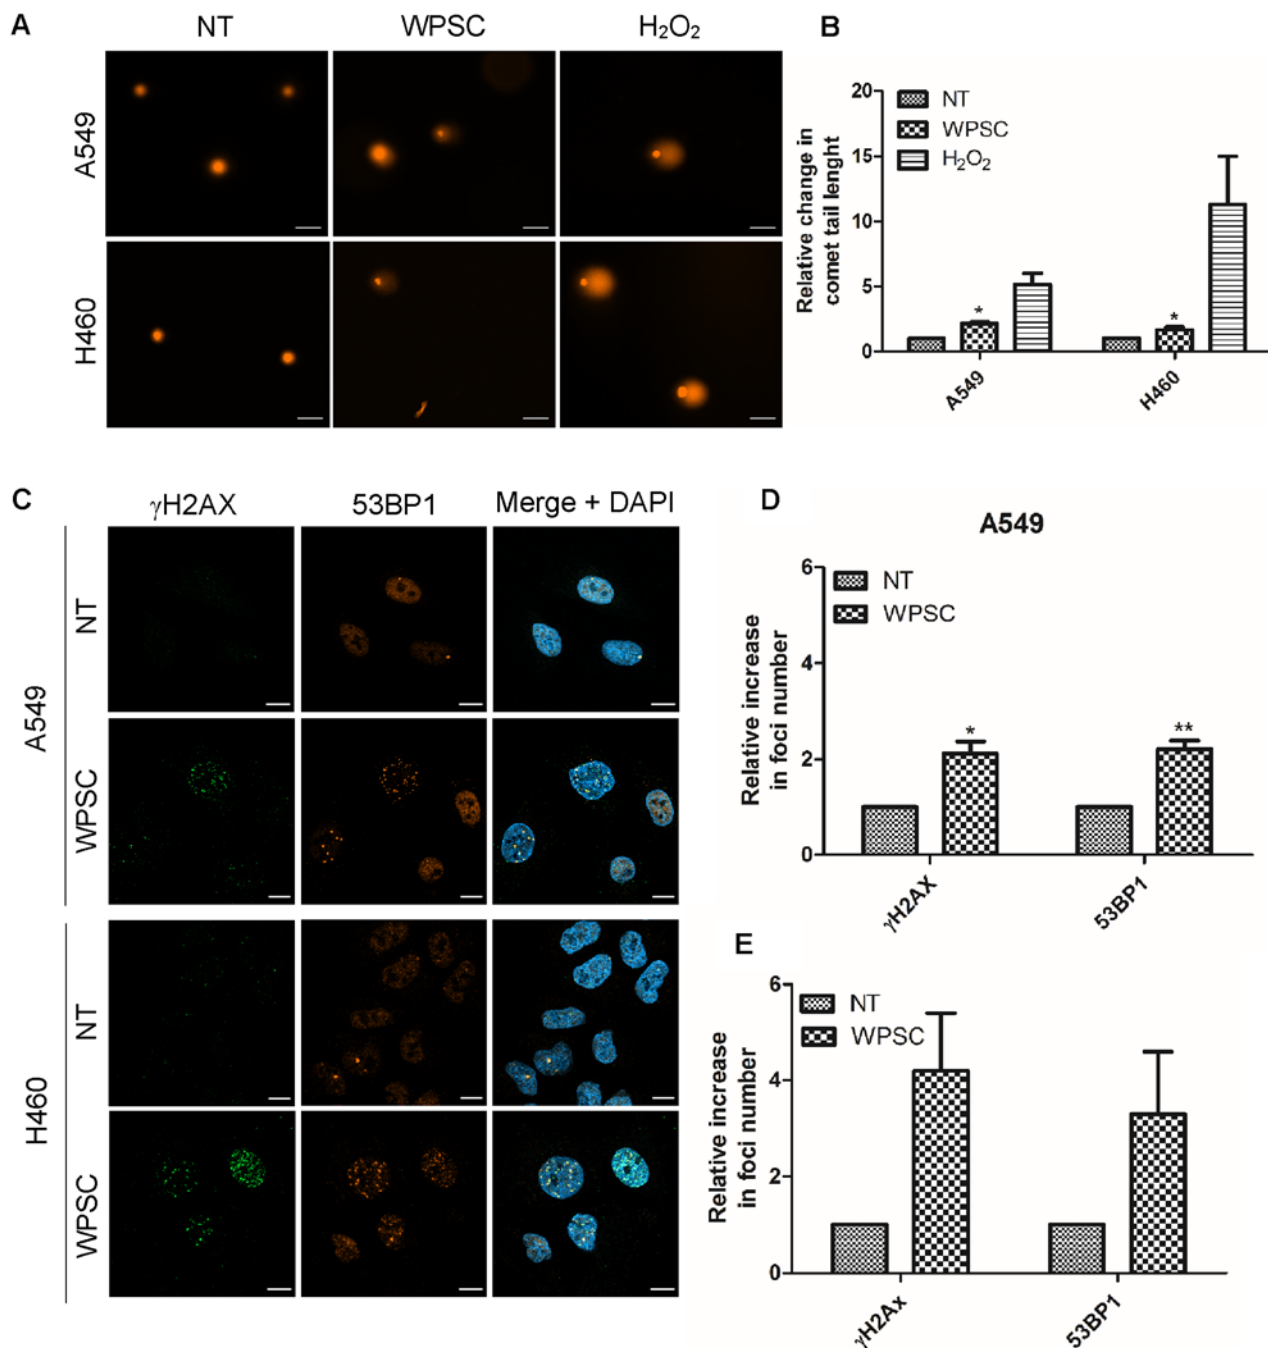

Supplement: Supplementary file 1 [file downloadSupplementary]
